# Supplementary material for: Rapid global phaseout of animal agriculture has the potential to stabilize greenhouse gas levels for 30 years and offset 68 percent of CO2 emissions this century
Source: PLOS journal article supplement (doi:10.1371/journal.pclm.0000010), 2022-02-01
Supplement: S9 (10.1371/journal.pclm.0000010.s009) [file journal.pclm.0000010.s009]

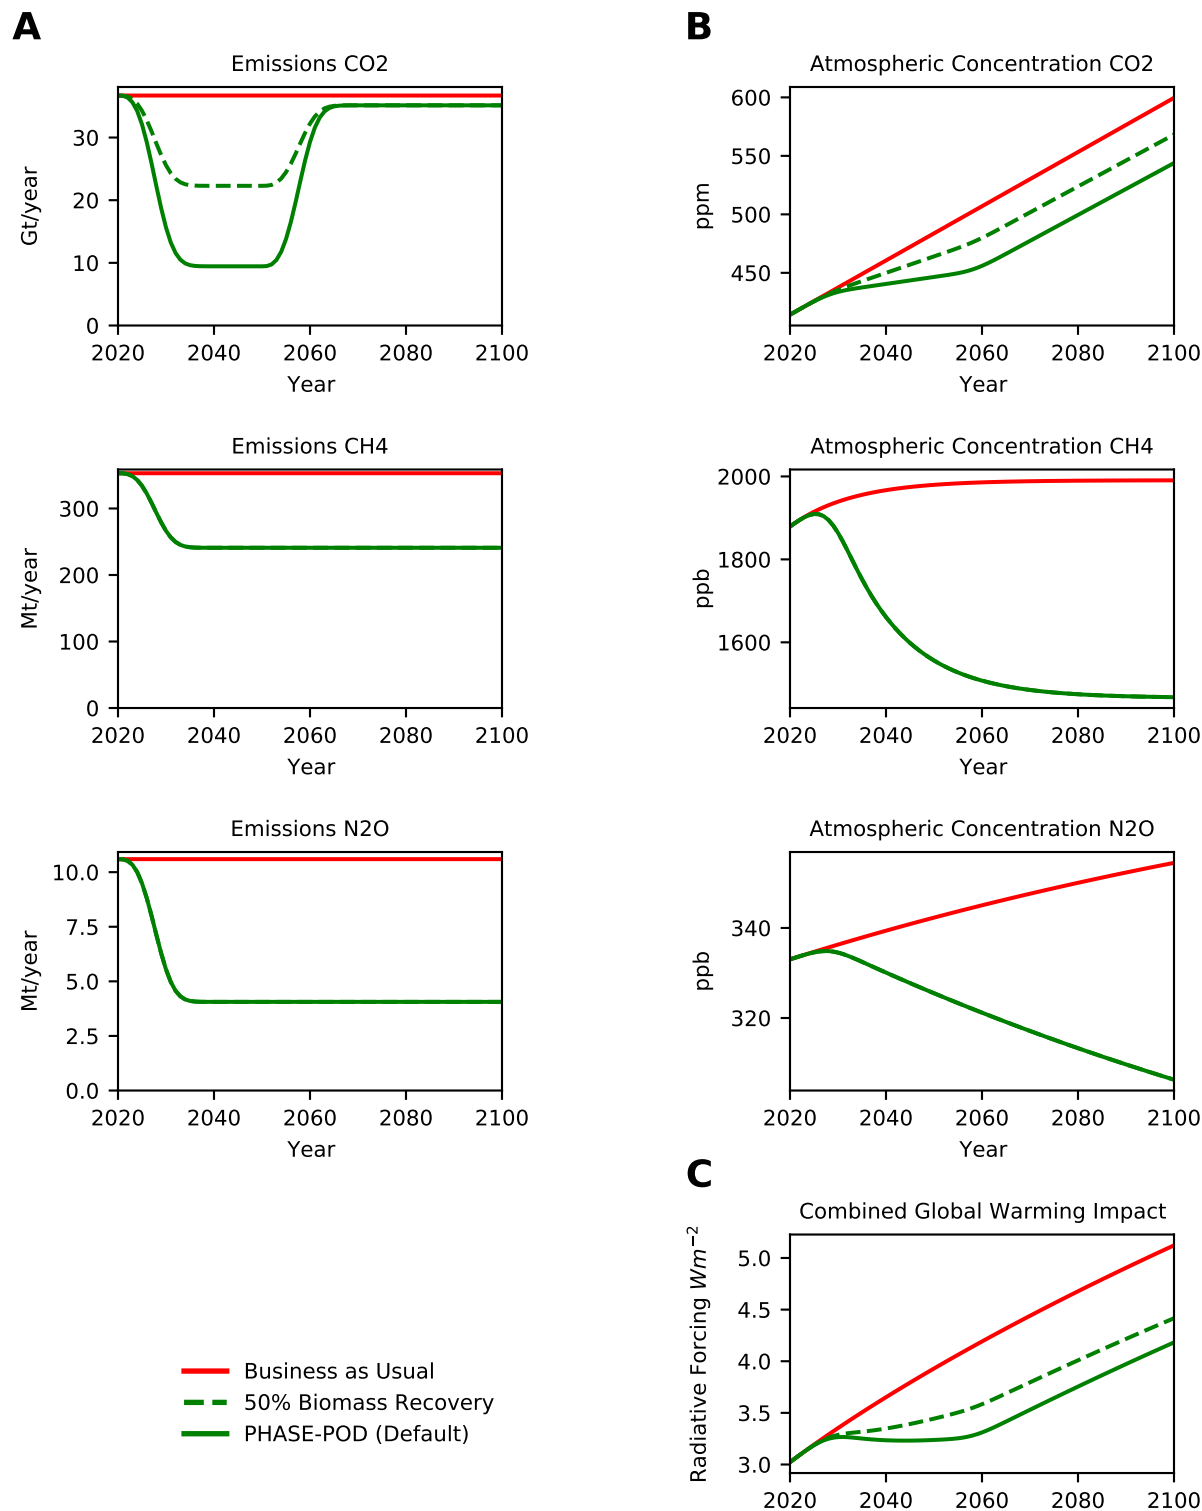

S9 Fig. 100% vs. 50% Biomass Recovery.

(A) Projected annual emissions of  $\text{CO}_2$ ,  $\text{CH}_4$  and  $\text{N}_2\text{O}$  for each scenario. (B) Projected atmospheric concentrations of  $\text{CO}_2$ ,  $\text{CH}_4$  and  $\text{N}_2\text{O}$  under each emission scenario. (C) Radiative Forcing (RF) inferred from atmospheric concentrations in (B) by formula of [30,32] as modified in MAGICC6 [29]. Only differences between PHASE-POD default assumptions (15yr phaseout, 30yr carbon recovery, 100% carbon recovery, BAU non-agriculture emissions, FAO crop replacement, and FAO animal ag emissions) are given.
